# Supplementary material
Source: PubMed Central journal article supplement (PMC3911136)
Supplement: JB.00877-13_zjb999092966so1.pdf [file JB.00877-13_zjb999092966so1.pdf]

## Supplementary Material

### **Characterization of two members among the five ADP-forming acyl-CoA synthetases reveals the presence of a 2-(imidazol-4-yl)acetyl-CoA synthetase in *Thermococcus kodakarensis***

Tomotsugu Awano<sup>1</sup>, Anja Wilming<sup>1,2</sup>, Hiroya Tomita<sup>1</sup>, Yuusuke Yokooji<sup>1</sup>,  
Toshiaki Fukui<sup>3</sup>, Tadayuki Imanaka<sup>4,5</sup> and Haruyuki Atomi<sup>1,5\*</sup>

<sup>1</sup>Department of Synthetic Chemistry and Biological Chemistry, Graduate School of Engineering, Kyoto University, Katsura, Nishikyo-ku, Kyoto 615-8510, Japan

<sup>2</sup>Department of Chemical Engineering, Biochemical Engineering, RWTH Aachen University, Worringer Weg 1, 52074 Aachen, Germany

<sup>3</sup>Department of Bioengineering, Graduate School of Bioscience and Biotechnology, Tokyo Institute of Technology, 4259 Nagatsuta, Midori-ku, Yokohama 226-8501, Japan.

<sup>4</sup>Department of Biotechnology, College of Life Sciences, Ritsumeikan University, Noji-Higashi, Kusatsu, Shiga 525-8577, Japan.

<sup>5</sup>JST, CREST, 7, Gobancho, Chiyoda-ku, Tokyo 102-0076, Japan.

Table S1. ATP-forming activity of ACS III<sub>Tk</sub> and ICS<sub>Tk</sub> with acyl-CoA substrates.

| Enzyme                | Specific activity (U mg <sup>-1</sup> ) with |                |                |              |
|-----------------------|----------------------------------------------|----------------|----------------|--------------|
|                       | Acetyl-CoA                                   | Isovaleryl-CoA | Isobutyryl-CoA | Succinyl-CoA |
| ACS III <sub>Tk</sub> | 27.3 ± 0.5                                   | 56.1 ± 1.0     | 52.0 ± 2.0     | ND           |
| ICS <sub>Tk</sub>     | 16.2 ± 0.7*                                  | ND             | ND             | ND           |

Activity measurements were carried out in the presence of 0.5 mM acyl-CoA, 0.4 mM ADP and 20 mM sodium phosphate.

ND, not detected.

\*Measured with 1 mM acetyl-CoA, 0.4 mM ADP and 20 mM sodium phosphate.
